# Supplementary material for: DC Respond to Cognate T Cell Interaction in the Antigen-Challenged Lymph Node
Source: PubMed Central journal article supplement (PMC6496461; doi:10.3389/fimmu.2019.00863), 2019-04-25
Supplement: Table_1.pdf [file Table_1.pdf]

## Suppl. Table 1

Upstream regulators – Ingenuity Pathway Analysis

| <b>Upstream regulators</b> | <b>OVA</b> | <b>BSA</b> | <b>diff(OVA-BSA)</b> |
|----------------------------|------------|------------|----------------------|
| TLR3                       | 2.42       | 0.00       | 2.42                 |
| TLR4                       | 2.38       | 0.00       | 2.38                 |
| TP53                       | 2.37       | 0.00       | 2.37                 |
| IRF1                       | 2.22       | 0.00       | 2.22                 |
| RELA                       | 2.19       | 0.00       | 2.19                 |
| RNASE2                     | 2.18       | 0.00       | 2.18                 |
| TLR2                       | 2.02       | 0.00       | 2.02                 |
| IL18                       | 2.02       | 0.00       | 2.02                 |
| TBK1                       | 1.98       | 0.00       | 1.98                 |
| TRPC1                      | 1.98       | 0.00       | 1.98                 |
| NFKB1                      | 1.98       | 0.00       | 1.98                 |
| WISP2                      | 1.96       | 0.00       | 1.96                 |
| IRF7                       | 1.95       | 0.00       | 1.95                 |
| TNF                        | 2.69       | 0.77       | 1.92                 |
| TP63                       | 1.67       | 0.00       | 1.67                 |
| CD40                       | 1.14       | -0.46      | 1.61                 |
| TGM2                       | 3.06       | 1.49       | 1.57                 |
| PTGS2                      | 1.52       | 0.00       | 1.52                 |
| P38 MAPK                   | 1.51       | 0.00       | 1.51                 |
| IL1B                       | 1.31       | -0.20      | 1.51                 |
| IL15                       | 1.50       | 0.00       | 1.50                 |
| NFkB (complex)             | 2.96       | 1.50       | 1.46                 |
| PI3K (family)              | 1.45       | 0.00       | 1.45                 |
| RNASE1                     | 1.43       | 0.00       | 1.43                 |
| Hsp27                      | 1.40       | 0.00       | 1.40                 |
